# Supplementary material for: Association between Dietary Patterns and Kidney Function Parameters in Adults with Metabolic Syndrome: A Cross-Sectional Study
Source: MDPI journal article supplement (doi:10.3390/nu13010040), 2020-12-24
Supplement: s1 [file s1]

# Supplementary Material: Association between Dietary Patterns and Kidney Function Parameters in Adults with Metabolic Syndrome: A Cross-Sectional Study

Ahmad Syauqy <sup>1,2</sup>, Chien-Yeh Hsu <sup>3,4</sup>, Hsiu-An Lee <sup>5</sup>, Hsiao-Hsien Rau <sup>6</sup> and Jane C.-J. Chao <sup>1,4,7,\*</sup>

**Table S1.** Food items and description of servings in each food group used to derive dietary patterns.

| Food Groups                | Food Items and Servings                                                                                                                                                                                                                                         |
|----------------------------|-----------------------------------------------------------------------------------------------------------------------------------------------------------------------------------------------------------------------------------------------------------------|
| Milk                       | Fresh milk, yogurt, powdered milk<br>(1 glass is equivalent to 240 mL of fresh milk, 240 mL of drying yogurt, or 4 tablespoons of powdered milk)                                                                                                                |
| Dairy products             | Yogurt, cheese<br>(1 serving is equivalent to 1 slice of yogurt or cheese)                                                                                                                                                                                      |
| Eggs                       | Chicken egg, duck egg, quail eggs<br>(1 serving is equivalent to 1 chicken or duck egg, or 5 quail eggs)                                                                                                                                                        |
| Meat                       | Pork, chicken, duck, beef, veal, lamb<br>(1 serving is equivalent to 1 pork or beef steak, approximately palm size, or 1 chicken leg, 1 hamburger patty, or 4 tablespoons of other lean meat)                                                                   |
| Seafood                    | Fish, shrimps, oysters<br>(1 serving is equivalent to 2 ounces of fish, 4 slices of row fish, 4 shrimps, or 16 oysters)                                                                                                                                         |
| Organ meats                | Liver, kidneys, heart, intestines<br>(1 serving is equivalent to a half bowl of pork or chicken liver, 8 chicken hearts, or 4 tablespoon of cooked pork intestines)                                                                                             |
| Legumes/soy products       | Tofu, soybean milk, dried beancurd<br>(1 serving is equivalent to a half box of packaged tofu, 240 mL of soybean milk, or 2 pieces of dried beancurd)                                                                                                           |
| Light-colored vegetables   | Cabbage, pechay, cucumber, radish<br>(1 serving is equivalent to a bowl of vegetables)                                                                                                                                                                          |
| Dark-colored vegetables    | Carrots, spinach, squash, tomatoes<br>(1 serving is equivalent to a bowl of vegetables)                                                                                                                                                                         |
| Vegetables in oil/dressing | Vegetables are fried with oil or with salad dressing<br>(This is mainly for calculating the fat intake and total calories)                                                                                                                                      |
| Fruit                      | Apple, grapefruit, guava, kiwi, papaya, watermelon, lychees, grapes, dragon eyes<br>(1 serving is equivalent to a half medium sized apple, grapefruit, or guava, 1 orange or kiwi, a half kilo of papaya or watermelon, 5 lychees, or 12 grapes or dragon eyes) |

|                           |                                                                                                                                                                                                                     |
|---------------------------|---------------------------------------------------------------------------------------------------------------------------------------------------------------------------------------------------------------------|
| Rice/flour products       | Rice, noodles, bread, twisted cruller<br>(1 serving is equivalent to a bowl of rice, two bowls of noodles, four slices of thin bread, 1 round bread, or 2 sets of baked wheat bread or twisted cruller)             |
| Whole grains              | Whole wheat bread, brown rice, mixed grains, oatmeal<br>(1 serving is equivalent to 4 slices of whole wheat bread, a bowl of brown rice or mixed grains, or 8 tablespoons of oatmeal)                               |
| Fried rice/flour products | Fried rice, fried noodles, fried rice noodles, baked wheat bread oil?<br>(1 serving is equivalent to a bowl of fried rice, fried noodles, or fried rice noodles, or 2 sets of baked wheat bread or twisted cruller) |
| Root crops                | Sweet potato, potato, taro, corn<br>(1 serving is equivalent to a bowl of root crops)                                                                                                                               |
| Refined dessert           | Red bean bread, butter bread, cake, cookies<br>(1 serving equivalent to 1 red bean bread or butter bread, 1 slice of cake, or 15 cookies)                                                                           |
| Jam/honey                 | Jam, honey<br>(1 serving is equivalent to 2 teaspoon of jam or honey)                                                                                                                                               |
| Sugary drinks             | Coffee, tea, fruit juice, soft drinks, green bean soup<br>(1 serving is equivalent to 240 mL or 1 glass)                                                                                                            |
| Deep-fried food           | Deep-fried potatoes, seafood, chicken, duck<br>(1 serving is equivalent to a half bowl)                                                                                                                             |
| Processed food            | Ham, sausage, canned food, preserved fish<br>(1 serving is equivalent to 1 tablespoon preserved vegetables, a half ounce of sausage, 2 slices of ham, or 1 tablespoon of canned meat)                               |
| Instant noodles           | Instant noodles, instant vermicelli, instant rice<br>(1 serving is equivalent to 1 bowl or a pack of instant noodles)                                                                                               |
| Sauce                     | Soy sauce, ketchup, hot sauce, vinegar, pepper salt<br>(1 serving is equivalent to 2 teaspoons of soy sauce, ketchup, hot sauce, or vinegar, or 1 teaspoon of pepper salt)                                          |

---
